# Supplementary material
Source: PubMed Central journal article supplement (PMC6599461)
Supplement: NIHMS1026895-supplement-supp.pdf [file NIHMS1026895-supplement-supp.pdf]

**Supplemental Table 1. Cohort Characteristics (Year 10) by Study Inclusion Status (n=2327)**

| <b>Characteristic</b>                 | <b>Included<br/>(n=837)</b> | <b>Excluded<br/>(n=1490)</b> | <b>p value</b> |
|---------------------------------------|-----------------------------|------------------------------|----------------|
| Age, median years (IQR)               | 35 (6)                      | 35 (6)                       | 0.169          |
| Race, n (%)                           |                             |                              |                |
| Black                                 | 358 (42.8)                  | 799 (53.6)                   | <0.001         |
| White                                 | 479 (57.2)                  | 691 (46.4)                   |                |
| BMI, median kg/cm <sup>2</sup> (IQR)  | 26.7 (5.7)                  | 25.9 (5.7)                   | 0.001          |
| Waist circumference, median cm (IQR)  | 89.0 (15.1)                 | 87.8 (14.5)                  | 0.005          |
| Total cholesterol median mg/dL (IQR)  | 181 (47)                    | 178 (50)                     | 0.013          |
| HDL median mg/dL (IQR)                | 43 (15)                     | 45 (15)                      | 0.004          |
| LDL median mg/dL (IQR)                | 114 (43)                    | 110 (43)                     | <0.001         |
| Triglycerides (TG) median mg/dL (IQR) | 86 (71)                     | 83 (70)                      | 0.283          |
| Diabetes history, n (%)               | 13 (1.6)                    | 6 (0.4)                      | 0.003          |
| HOMA-IR                               | 1.83 (1.21)                 | 1.75 (1.29)                  | 0.074          |

**Supplemental Table 2. Association of Sex Hormone Binding Globulin (SHBG) and Testosterone (T) with Prevalent NAFLD on Progressive Covariate Adjustment**

| <b><i>Adjusted for SHBG or T*</i></b>                                | <b>OR (95% CI)</b> | <b>p value</b> |
|----------------------------------------------------------------------|--------------------|----------------|
| SHBG (per 10 units)                                                  | 0.63 (0.49-0.80)   | <0.001         |
| T (per quartile)                                                     | 0.79 (0.64-0.98)   | 0.029          |
| <b><i>Adjusted for Year 10 Covariates**</i></b>                      | <b>OR (95% CI)</b> | <b>p value</b> |
| SHBG (per 10 units)                                                  | 0.73 (0.57-0.92)   | 0.009          |
| SHBG (per 10 units) + T adjustment                                   | 0.74 (0.56-0.96)   | 0.023          |
| T (per quartile)                                                     | 0.86 (0.70-1.06)   | 0.160          |
| T (per quartile) + SHBG adjustment                                   | 0.98 (0.78-1.23)   | 0.842          |
| <b><i>Adjusted for Year 10 and Δ Year 10 to 25 Covariates***</i></b> | <b>OR (95% CI)</b> | <b>p value</b> |
| SHBG (per 10 units)                                                  | 0.68 (0.52-0.89)   | 0.006          |
| SHBG (per 10 units) + T adjustment                                   | 0.68 (0.51-0.92)   | 0.013          |
| T (per quartile)                                                     | 0.85 (0.68-1.07)   | 0.169          |
| T (per quartile) + SHBG adjustment                                   | 0.96 (0.76-1.27)   | 0.909          |

\* SHBG estimates adjusted for T and vice versa given established effects of the hormones on one another.

\*\*Includes age, race, center, waist circumference, HOMA-IR, and HDL. LDL and triglycerides were not significant on adjusted analysis.

\*\*\* Δ values reflect unit change from Years 10 to 25 to capture potential confounding effects of metabolic parameters over time.
